# Supplementary material for: Changes in Retinal Sensitivity Associated With Cotoretigene Toliparvovec in X-Linked Retinitis Pigmentosa With RPGR Gene Variations
Source: PubMed Central journal article supplement — JAMA Ophthalmol. 2023 Feb 9;141(3):275–83. doi: 10.1001/jamaophthalmol.2022.6254 (PMC9912164; doi:10.1001/jamaophthalmol.2022.6254), 2023-02-09
Supplement: jamaophthalmol-e226254-s002.pdf [file jamaophthalmol-e226254-s002.pdf]

| <b>*Group Name(s): XIRIUS Part 1 Study Group and XOLARIS Study Group</b> |                                 |                              |                         |                                                                         |                                                 |                                                                |                                                                                                   |
|--------------------------------------------------------------------------|---------------------------------|------------------------------|-------------------------|-------------------------------------------------------------------------|-------------------------------------------------|----------------------------------------------------------------|---------------------------------------------------------------------------------------------------|
| <b>*First Name and Middle Initial(s)</b>                                 | <b>*Last Name</b>               | <b>*Suffix (eg, Jr, III)</b> | <b>Academic Degrees</b> | <b>Institution</b>                                                      | <b>Location (city, state/province, country)</b> | <b>Role or Contribution, eg, chair, principal investigator</b> | <b>Group (if more than 1 Group listed in the byline) and/or Subgroup (eg, Steering Committee)</b> |
| Imran H.                                                                 | Yusuf                           |                              | MD, PhD                 | Nuffield Laboratory of Ophthalmology, John Radcliffe Hospital West Wing | Oxford, Oxfordshire, UK                         | Study Group Subinvestigator                                    | XIRIUS study group                                                                                |
| Jasmina                                                                  | Cehajic-Kapetanovic             |                              | MD, PhD                 | Nuffield Laboratory of Ophthalmology, John Radcliffe Hospital West Wing | Oxford, Oxfordshire, UK                         | Study Group Subinvestigator                                    | XIRIUS study group                                                                                |
| Amandeep S.                                                              | Josan                           |                              | BSc, PhD                | Nuffield Laboratory of Ophthalmology, John Radcliffe Hospital West Wing | Oxford, Oxfordshire, UK                         | Study Group Subinvestigator                                    | XIRIUS study group                                                                                |
| Cristina                                                                 | Martinez-Fernandez de la Camera |                              | MD                      | Nuffield Laboratory of Ophthalmology, John Radcliffe Hospital West Wing | Oxford, Oxfordshire, UK                         | Study Group Subinvestigator                                    | XIRIUS study group                                                                                |
| Salwah                                                                   | Rehman                          |                              | MD                      | Nuffield Laboratory of Ophthalmology, John Radcliffe Hospital West Wing | Oxford, Oxfordshire, UK                         | Study Group Subinvestigator                                    | XIRIUS study group                                                                                |
| Laura J.                                                                 | Wood                            |                              | BSc                     | Nuffield Laboratory of Ophthalmology, John Radcliffe Hospital West Wing | Oxford, Oxfordshire, UK                         | Study Group Subinvestigator                                    | XIRIUS study group                                                                                |
| Jasleen K.                                                               | Jolly                           |                              | PhD                     | Nuffield Laboratory of Ophthalmology, John Radcliffe Hospital West Wing | Oxford, Oxfordshire, UK                         | Study Group Subinvestigator                                    | XIRIUS study group                                                                                |
| Kanmin                                                                   | Xue                             |                              | MD, PhD                 | Nuffield Laboratory of Ophthalmology, John Radcliffe Hospital West Wing | Oxford, Oxfordshire, UK                         | Study Group Subinvestigator                                    | XIRIUS study group                                                                                |
| Anika                                                                    | Nanda                           |                              | MD                      | Nuffield Laboratory of Ophthalmology, John Radcliffe Hospital West Wing | Oxford, Oxfordshire, UK                         | Study Group Subinvestigator                                    | XIRIUS study group                                                                                |
| Kirti                                                                    | Jasani                          |                              | MD                      | Nuffield Laboratory of Ophthalmology, John Radcliffe Hospital West Wing | Oxford, Oxfordshire, UK                         | Study Group Subinvestigator                                    | XIRIUS study group                                                                                |
| Moreno                                                                   | Menghini                        |                              | MD                      | Nuffield Laboratory of Ophthalmology, John Radcliffe Hospital West Wing | Oxford, Oxfordshire, UK                         | Study Group Subinvestigator                                    | XIRIUS study group                                                                                |

## Supplemental Online Content: Nonauthor Collaborators

\*First name, last name, and suffix (if applicable) are required and will appear in PubMed.

| *First Name and Middle Initial(s) | *Last Name        | *Suffix (eg, Jr, III) | Academic Degrees | Institution                                                                                               | Location (city, state/province, country) | Role or Contribution, eg, chair, principal investigator | Group (if more than 1 Group listed in the byline) and/or Subgroup (eg, Steering Committee) |
|-----------------------------------|-------------------|-----------------------|------------------|-----------------------------------------------------------------------------------------------------------|------------------------------------------|---------------------------------------------------------|--------------------------------------------------------------------------------------------|
| Thomas M.W.                       | Buckley           |                       | MD               | Nuffield Laboratory of Ophthalmology, John Radcliffe Hospital West Wing                                   | Oxford, Oxfordshire, UK                  | Study Group Subinvestigator                             | XIRIUS study group                                                                         |
| Anna Paola                        | Salveti           |                       | MD               | Nuffield Laboratory of Ophthalmology, John Radcliffe Hospital West Wing                                   | Oxford, Oxfordshire, UK                  | Study Group Subinvestigator                             | XIRIUS study group                                                                         |
| Suresh                            | Thulasidharan     |                       | MD               | University Hospital Southampton Southampton Eye Unit                                                      | Southampton, Hampshire, UK               | Study Group Subinvestigator                             | XIRIUS study group                                                                         |
| Miguel                            | Kurc              |                       | MD               | University Hospital Southampton Southampton Eye Unit                                                      | Southampton, Hampshire, UK               | Study Group Subinvestigator                             | XIRIUS study group                                                                         |
| Samir                             | Khandhadia        |                       | MD               | University Hospital Southampton Southampton Eye Unit                                                      | Southampton, Hampshire, UK               | Study Group Subinvestigator                             | XIRIUS study group                                                                         |
| Karla                             | Orsine Murta Dias |                       | MD               | University Hospital Southampton Southampton Eye Unit                                                      | Southampton, Hampshire, UK               | Study Group Subinvestigator                             | XIRIUS study group                                                                         |
| Abeir                             | Baltmr            |                       | MD               | University Hospital Southampton Southampton Eye Unit                                                      | Southampton, Hampshire, UK               | Study Group Subinvestigator                             | XIRIUS study group                                                                         |
| Nakul                             | Mandal            |                       | MD               | University Hospital Southampton Southampton Eye Unit                                                      | Southampton, Hampshire, UK               | Study Group Subinvestigator                             | XIRIUS study group                                                                         |
| Georgios                          | Tsokolas          |                       | MD               | University Hospital Southampton Southampton Eye Unit                                                      | Southampton, Hampshire, UK               | Study Group Subinvestigator                             | XIRIUS study group                                                                         |
| Paulo                             | Stanga            |                       | MD               | Manchester University, Manchester Royal Eye Hospital                                                      | Manchester, Greater Manchester, UK       | Study Group Investigator                                | XIRIUS study group                                                                         |
| Tsveta                            | Ivanova           |                       | MD               | Manchester University, Manchester Royal Eye Hospital                                                      | Manchester, Greater Manchester, UK       | Study Group Subinvestigator                             | XIRIUS study group                                                                         |
| Muhannd                           | EL-Faouri         |                       | MD               | Manchester University, Manchester Royal Eye Hospital                                                      | Manchester, Greater Manchester, UK       | Study Group Subinvestigator                             | XIRIUS study group                                                                         |
| Sherif                            | Shaarawy          |                       | MD               | Manchester University, Manchester Royal Eye Hospital                                                      | Manchester, Greater Manchester, UK       | Study Group Subinvestigator                             | XIRIUS study group                                                                         |
| Graeme                            | Black             |                       | MD               | Manchester University, Manchester Royal Eye Hospital                                                      | Manchester, Greater Manchester, UK       | Study Group Subinvestigator                             | XIRIUS study group; XOLARIS study group                                                    |
| Janet                             | Louise Davis      |                       | MD               | University of Miami Miller School of Medicine, Anne Bates Leach Eye Hospital, Bascom Palmer Eye Institute | Miami, FL, USA                           | Study Group Subinvestigator                             | XIRIUS study group                                                                         |

## Supplemental Online Content: Nonauthor Collaborators

\*First name, last name, and suffix (if applicable) are required and will appear in PubMed.

| *First Name and Middle Initial(s) | *Last Name           | *Suffix (eg, Jr, III) | Academic Degrees | Institution                                                                                                 | Location (city, state/province, country) | Role or Contribution, eg, chair, principal investigator | Group (if more than 1 Group listed in the byline) and/or Subgroup (eg, Steering Committee) |
|-----------------------------------|----------------------|-----------------------|------------------|-------------------------------------------------------------------------------------------------------------|------------------------------------------|---------------------------------------------------------|--------------------------------------------------------------------------------------------|
| Ninel                             | Gregori              |                       | MD               | University of Miami Miller School of Medicine, Anne Bates Leach Eye Hospital, Bascom Palmer Eye Institute   | Miami, FL, USA                           | Study Group Subinvestigator                             | XIRIUS study group                                                                         |
| Carlos E.                         | Mendoza-Santiesteban |                       | MD               | University of Miami Miller School of Medicine, Anne Bates Leach Eye Hospital, Bascom Palmer Eye Institute   | Miami, FL, USA                           | Study Group Subinvestigator                             | XIRIUS study group                                                                         |
| Potyra R.                         | Rosa                 |                       | MD               | University of Miami Miller School of Medicine, Anne Bates Leach Eye Hospital, Bascom Palmer Eye Institute   | Miami, FL, USA                           | Study Group Subinvestigator                             | XIRIUS study group                                                                         |
| Kevin G.                          | Evans                |                       |                  | University of British Columbia                                                                              | Vancouver, Canada                        | Study Group Investigator                                | XOLARIS Study Group                                                                        |
| Rob                               | Koenekoop            |                       |                  | The Research Institute of the McGill University Health Centre                                               | Montreal, Canada                         | Study Group Investigator                                | XOLARIS Study Group                                                                        |
| Dominik                           | Fischer              |                       |                  | Universitätsklinikum der Eberhard Karls Universität Tübingen, STZ eyetrial am Department für Augenheilkunde | Tübingen, Germany                        | Study Group Investigator                                | XOLARIS Study Group                                                                        |
| Frank                             | Holz                 |                       |                  | Universitäts-Augenklinik Bonn                                                                               | Bonn, Germany                            | Study Group Investigator                                | XOLARIS Study Group                                                                        |
| Kamron                            | Khan                 |                       |                  | St James's Hospital                                                                                         | Leeds, UK                                | Study Group Investigator                                | XOLARIS Study Group                                                                        |
| Jason                             | Horowitz             |                       |                  | Columbia University Medical Center, Edward S. Harkness Eye Institute                                        | New York, NY, USA                        | Study Group Investigator                                | XOLARIS Study Group                                                                        |
| Mark                              | Pennesi              |                       |                  | Oregon Health and Science University, Casey Eye Institute (Marquam Hill)                                    | Portland, OR, USA                        | Study Group Investigator                                | XOLARIS Study Group                                                                        |
| David                             | Birch                |                       |                  | Retina Foundation of the Southwest                                                                          | Dallas, TX, USA                          | Study Group Investigator                                | XOLARIS Study Group                                                                        |

## Supplemental Online Content: Nonauthor Collaborators

\*First name, last name, and suffix (if applicable) are required and will appear in PubMed.

| *First Name and Middle Initial(s) | *Last Name | *Suffix (eg, Jr, III) | Academic Degrees | Institution                                                                                                       | Location (city, state/province, country) | Role or Contribution, eg, chair, principal investigator | Group (if more than 1 Group listed in the byline) and/or Subgroup (eg, Steering Committee) |
|-----------------------------------|------------|-----------------------|------------------|-------------------------------------------------------------------------------------------------------------------|------------------------------------------|---------------------------------------------------------|--------------------------------------------------------------------------------------------|
| Michael                           | Gorin      |                       |                  | Jules Stein Eye Institute, David Geffen School of Medicine, Department of Ophthalmology, University of California | Los Angeles, CA, USA                     | Study Group Investigator                                | XOLARIS Study Group                                                                        |
| Kim                               | Stepien    |                       |                  | University of Wisconsin, Dept. of Ophthalmology and Visual Sciences                                               | Madison, WI, USA                         | Study Group Investigator                                | XOLARIS Study Group                                                                        |
| Jacque                            | Duncan     |                       |                  | UCSF School of Medicine, Beckman Vision Center                                                                    | San Francisco, CA, USA                   | Study Group Investigator                                | XOLARIS Study Group                                                                        |
| Tim                               | Stout      |                       |                  | Cullen Eye Institute                                                                                              | Houston, TX, USA                         | Study Group Investigator                                | XOLARIS Study Group                                                                        |
| Benjamin                          | Bakall     |                       |                  | University of Arizona                                                                                             | Phoenix, AZ, USA                         | Study Group Investigator                                | XOLARIS Study Group                                                                        |
| Paul S.                           | Bernstein  |                       |                  | The University of Utah, John A. Moran Eye Center                                                                  | Salt Lake City, UT, USA                  | Study Group Investigator                                | XOLARIS Study Group                                                                        |
| Eeva-Maria                        | Sankila    |                       |                  | Helsinki University Central Hospital HUCH, Läntinen silmäsairaala                                                 | Helsinki, Finland                        | Study Group Investigator                                | XOLARIS Study Group                                                                        |
| Carel                             | Hoyng      |                       |                  | Radboud University Medical Center, Department of Ophthalmology and Human                                          | Nijmegen, Netherlands                    | Study Group Investigator                                | XOLARIS Study Group                                                                        |
| Camiel                            | Boon       |                       |                  | Leiden University Medical Center                                                                                  | Leiden, Netherlands                      | Study Group Investigator                                | XOLARIS Study Group                                                                        |
| Isabelle                          | Meunier    |                       |                  | Institute for Neurosciences of Montpellier, Hôpital Saint Eloi, CHRU Montpellier                                  | Montpellier, France                      | Study Group Investigator                                | XOLARIS Study Group                                                                        |
