# Supplementary material for: Changes in Retinal Sensitivity Associated With Cotoretigene Toliparvovec in X-Linked Retinitis Pigmentosa With RPGR Gene Variations
Source: PubMed Central journal article supplement — JAMA Ophthalmol. 2023 Feb 9;141(3):275–83. doi: 10.1001/jamaophthalmol.2022.6254 (PMC9912164; doi:10.1001/jamaophthalmol.2022.6254), 2023-02-09
Supplement: jamaophthalmol-e226254-s003.pdf [file jamaophthalmol-e226254-s003.pdf]

von Krusenstiern L, Liu J, Liao E, et al; XIRIUS Part 1 Study Group; XOLARIS Study Group. Changes in retinal sensitivity associated with cotoretigene toliparvovec in X-linked retinitis pigmentosa with *RPGR* gene variations. *JAMA Ophthalmol*. Published online February 9, 2023. doi:10.1001/jamaophthalmol.2022.6254

### **Data Sharing Statement**

#### **Data**

**Data available:** Yes

#### **Additional Information**

**Explanation for why data not available:** To request access to available data, please visit <http://www.biogenclinicaldatarequest.com>
